# Supplementary material for: Lyme Disease: Knowledge and Practices of Family Practitioners in Southern Quebec
Source: Hindawi journal article supplement (doi:10.1155/2015/846963), 2015-01-01
Supplement: f1 [file 846963.f1.pdf]

## Questionnaire sur les pratiques relatives à la maladie de Lyme

La maladie de Lyme est en émergence dans le sud du Québec. En plus du suivi des cas et du suivi de la présence des tiques, l'Institut national de santé publique du Québec s'intéresse aux pratiques de diagnostic et de traitement de cette maladie afin d'identifier les besoins d'information des médecins omnipraticiens pour la gestion des cas de maladie de Lyme.

Pour collecter l'information, nous utilisons le véhicule des activités de formation continue organisées par les associations régionales d'omnipraticiens dont nous avons le soutien. Nous ne sommes pas liés aux compagnies pharmaceutiques pouvant aider à organiser ces rencontres.

Ce questionnaire est anonyme et les réponses seront traitées de façon confidentielle. Pour toute information d'ordre éthique concernant les conditions dans lesquelles se déroule votre participation à ce projet, vous pouvez contacter le coordonnateur Comité d'éthique de la recherche en santé (CERES) par courriel : [ceres@umontreal.ca](mailto:ceres@umontreal.ca) ou par téléphone au (514) 343-6111 poste 2604.

Une brochure avec de l'information pertinente sur la maladie de Lyme vous sera fournie dès que vous remettrez le questionnaire.

### **Merci de votre collaboration.**

Pour toute information ou question, veuillez contacter :

Dr François Milord, médecin conseil à l'INSPQ, 450-928-6777 #3103, [f.milord@rrsss16.gouv.qc.ca](mailto:f.milord@rrsss16.gouv.qc.ca)  
ou Cécile Ferrouillet, agente de recherche, 450-773-8521 #0090, [cecile.ferrouillet@umontreal.ca](mailto:cecile.ferrouillet@umontreal.ca)

## Questionnaire sur les pratiques relatives à la maladie de Lyme

1. Quelle est votre profession : ☐<sup>1</sup> Omnipraticien ☐<sup>0</sup> Autre ► Spécifiez : \_\_\_\_\_

2. En 2011, pour environ combien de patients différents ...

|                                                                   | Nombre de cas                         |                                       |                                       |                                       |                                       |
|-------------------------------------------------------------------|---------------------------------------|---------------------------------------|---------------------------------------|---------------------------------------|---------------------------------------|
|                                                                   | 0                                     | 1-2                                   | 3-5                                   | 6-10                                  | >10                                   |
| a) avez-vous été consulté pour une piqure de tique ?              | <input type="checkbox"/> <sup>0</sup> | <input type="checkbox"/> <sup>1</sup> | <input type="checkbox"/> <sup>2</sup> | <input type="checkbox"/> <sup>3</sup> | <input type="checkbox"/> <sup>4</sup> |
| b) avez-vous envisagé un diagnostic de maladie de Lyme ?          | <input type="checkbox"/> <sup>0</sup> | <input type="checkbox"/> <sup>1</sup> | <input type="checkbox"/> <sup>2</sup> | <input type="checkbox"/> <sup>3</sup> | <input type="checkbox"/> <sup>4</sup> |
| c) avez-vous prescrit des antibiotiques pour la maladie de Lyme ? | <input type="checkbox"/> <sup>0</sup> | <input type="checkbox"/> <sup>1</sup> | <input type="checkbox"/> <sup>2</sup> | <input type="checkbox"/> <sup>3</sup> | <input type="checkbox"/> <sup>4</sup> |

3. La maladie de Lyme est transmise par des tiques infectées par la bactérie *Borrelia burgdorferi*. Considérez-vous que cette maladie peut être acquise ...

|                                    | Oui                                   | Non                                   | Ne sais pas                            |
|------------------------------------|---------------------------------------|---------------------------------------|----------------------------------------|
| a) au Québec ?                     | <input type="checkbox"/> <sup>1</sup> | <input type="checkbox"/> <sup>0</sup> | <input type="checkbox"/> <sup>98</sup> |
| b) dans votre région de pratique ? | <input type="checkbox"/> <sup>1</sup> | <input type="checkbox"/> <sup>0</sup> | <input type="checkbox"/> <sup>98</sup> |

4. Connaissiez-vous les zones endémiques pour la maladie de Lyme dans les pays et régions suivantes :

|               | Oui                                   | Non                                   | Ne sais pas                            |
|---------------|---------------------------------------|---------------------------------------|----------------------------------------|
| a) Canada     | <input type="checkbox"/> <sup>1</sup> | <input type="checkbox"/> <sup>0</sup> | <input type="checkbox"/> <sup>98</sup> |
| b) États-Unis | <input type="checkbox"/> <sup>1</sup> | <input type="checkbox"/> <sup>0</sup> | <input type="checkbox"/> <sup>98</sup> |
| d) Europe     | <input type="checkbox"/> <sup>1</sup> | <input type="checkbox"/> <sup>0</sup> | <input type="checkbox"/> <sup>98</sup> |

5. Un patient présente une piqure de tique objectivée. Il n'a pas de symptôme et l'examen physique est normal. Que faites-vous ou que feriez-vous ? (Cocher un seul choix)

- ☐<sup>1</sup> Sérologie pour la maladie de Lyme  
☐<sup>2</sup> Traitement antibiotique seul pour traiter la maladie de Lyme  
☐<sup>3</sup> Sérologie et traitement antibiotique pour la maladie de Lyme  
☐<sup>4</sup> Pas de sérologie, ni de traitement antibiotique, éduquer le patient, reconsulter au besoin  
☐<sup>5</sup> J'ai besoin de m'informer pour prendre en charge ce cas  
☐<sup>6</sup> Autre action ou traitement mis en œuvre ► Spécifiez : \_\_\_\_\_

6. Est-ce que votre prise en charge d'un patient avec une piqure de tique est différente si la piqure de tique a lieu dans une zone reconnue endémique (c'est-à-dire avec de nombreuses tiques infectées par *Borrelia burgdorferi*) ?

- ☐<sup>0</sup> Non  
☐<sup>1</sup> Oui ► Si oui, spécifiez : \_\_\_\_\_  
☐<sup>98</sup> Ne sais pas

7. Lors de la consultation, le patient apporte la tique l'ayant piqué. Vous décidez d'envoyer la tique au laboratoire pour identification et recherche de *Borrelia burgdorferi*. Selon vous, à quoi servent les résultats d'analyse ?

|                                                               | Oui                                   | Non                                   | Ne sais pas                            |
|---------------------------------------------------------------|---------------------------------------|---------------------------------------|----------------------------------------|
| a) Outil de décision pour le diagnostic de la maladie de Lyme | <input type="checkbox"/> <sup>1</sup> | <input type="checkbox"/> <sup>0</sup> | <input type="checkbox"/> <sup>98</sup> |
| b) Identification des zones à risque au Québec                | <input type="checkbox"/> <sup>1</sup> | <input type="checkbox"/> <sup>0</sup> | <input type="checkbox"/> <sup>98</sup> |

8. Selon vous, laquelle de ces caractéristiques ne correspond pas à la définition classique de l'érythème migrant ? (Cocher un seul choix)

- ☐<sup>1</sup> Lésion en cible (lésion avec un centre clair et une bordure plus foncée)  
☐<sup>2</sup> Lésion qui s'étend, plus grande ou égale à 5 cm  
☐<sup>3</sup> Lésion présente chez 60 à 80% des cas  
☐<sup>4</sup> Lésion douloureuse  
☐<sup>98</sup> Ne sais pas

9. Vous diagnostiquez chez un patient un érythème migrant (lésion cutanée érythémateuse caractéristique de la maladie de Lyme). Que faites-vous ou que feriez-vous ? (Cocher un seul choix)

- ☐<sup>1</sup> Sérologie pour la maladie de Lyme seule  
☐<sup>2</sup> Traitement antibiotique seul pour traiter la maladie de Lyme  
☐<sup>3</sup> Sérologie et traitement antibiotique pour la maladie de Lyme  
☐<sup>4</sup> Pas de sérologie, ni de traitement antibiotique, éduquer le patient, reconsulter au besoin  
☐<sup>5</sup> J'ai besoin de m'informer pour prendre en charge ce cas  
☐<sup>6</sup> Autre action ou traitement mis en œuvre ► Spécifiez : \_\_\_\_\_

10. Parmi les manifestations cliniques suivantes, lesquelles vous feraient penser que le patient est en phase précoce de la maladie de Lyme ?

|                                     | Oui                                   | Non                                   | Ne sais pas                            |
|-------------------------------------|---------------------------------------|---------------------------------------|----------------------------------------|
| a) Fièvre                           | <input type="checkbox"/> <sup>1</sup> | <input type="checkbox"/> <sup>0</sup> | <input type="checkbox"/> <sup>98</sup> |
| b) Érythème migrant                 | <input type="checkbox"/> <sup>1</sup> | <input type="checkbox"/> <sup>0</sup> | <input type="checkbox"/> <sup>98</sup> |
| c) Myalgies et arthralgies diffuses | <input type="checkbox"/> <sup>1</sup> | <input type="checkbox"/> <sup>0</sup> | <input type="checkbox"/> <sup>98</sup> |
| d) Bloc auriculo-ventriculaire      | <input type="checkbox"/> <sup>1</sup> | <input type="checkbox"/> <sup>0</sup> | <input type="checkbox"/> <sup>98</sup> |
| e) Névrite crânienne                | <input type="checkbox"/> <sup>1</sup> | <input type="checkbox"/> <sup>0</sup> | <input type="checkbox"/> <sup>98</sup> |
| f) Diarrhée                         | <input type="checkbox"/> <sup>1</sup> | <input type="checkbox"/> <sup>0</sup> | <input type="checkbox"/> <sup>98</sup> |

11. Si un patient présente une manifestation clinique compatible avec la maladie de Lyme et que la sérologie initiale pour cette même maladie est négative, que faites-vous ?

☐<sup>1</sup> Conclure à l'absence de maladie de Lyme      ☐<sup>2</sup> 2<sup>e</sup> sérologie 2 à 4 semaines plus tard      ☐<sup>98</sup> Ne sais pas

12. Avez-vous déjà prescrit une sérologie à un patient dans le contexte d'une maladie de Lyme chronique ?

☐<sup>0</sup> Non

☐<sup>1</sup> Oui ► Si oui, spécifiez la ou les raison(s) : ☐<sup>a</sup> Inquiétude du patient  
☐<sup>b</sup> Fatigue chronique  
☐<sup>c</sup> Polyradiculopathies chroniques  
☐<sup>d</sup> Arthrites  
☐<sup>e</sup> Autre(s) ► Précisez : \_\_\_\_\_

☐<sup>98</sup> Ne sais pas

13. Quels seraient vos besoins d'information concernant la maladie de Lyme ? (Cocher tout ce qui s'applique.)

| 1. Sujet couvert                                                           | 2. Médium de l'information                                        |
|----------------------------------------------------------------------------|-------------------------------------------------------------------|
| <input type="checkbox"/> <sup>a</sup> Reconnaissance de l'érythème migrant | <input type="checkbox"/> <sup>a</sup> Formation                   |
| <input type="checkbox"/> <sup>b</sup> Tests de laboratoire                 | <input type="checkbox"/> <sup>b</sup> Fiches cliniques            |
| <input type="checkbox"/> <sup>c</sup> Traitement                           | <input type="checkbox"/> <sup>c</sup> Site Web                    |
| <input type="checkbox"/> <sup>d</sup> Autre(s) ► Précisez : _____          | <input type="checkbox"/> <sup>d</sup> Autre(s) ► Précisez : _____ |

14. Quelles sont vos sources actuelles d'information sur la maladie de Lyme ? (Cocher tout ce qui s'applique.)

☐<sup>a</sup> Collègue      ☐<sup>d</sup> Aucune  
☐<sup>b</sup> Bulletin d'information de la santé publique      ☐<sup>e</sup> Autre(s) ► Précisez : \_\_\_\_\_  
☐<sup>c</sup> Site web

Les prochaines questions nous aideront à établir le profil des répondants.  
 Les données seront traitées de façon confidentielle.

15. Nombre moyen de patients vus par semaine en 2011, toutes raisons de consultation confondues: \_\_\_\_\_ patients

16. Sexe : ☐<sup>1</sup> Masculin    ☐<sup>2</sup> Féminin

17. Année de début de la pratique : \_\_\_\_\_

18. Lieu de pratique ? (Cocher tout ce qui s'applique.)

☐<sup>a</sup> Cabinet privé    ☐<sup>c</sup> UMF    ☐<sup>e</sup> CHSLD    ☐<sup>s</sup> Autre(s) ► Précisez : \_\_\_\_\_  
☐<sup>b</sup> GMF    ☐<sup>d</sup> CLSC    ☐<sup>f</sup> Centre hospitalier

19. Dans quel territoire de CSSS travaillez-vous ? (Cocher tout ce qui s'applique.)

☐<sup>a</sup> Champlain    ☐<sup>d</sup> Haut-Saint-Laurent    ☐<sup>s</sup> Jardins-Roussillon    ☐<sup>j</sup> Richelieu-Yamaska  
☐<sup>b</sup> Haute-Yamaska    ☐<sup>e</sup> Suroît    ☐<sup>h</sup> La Pommeraie    ☐<sup>k</sup> Vaudreuil-Soulanges  
☐<sup>c</sup> Sorel-Tracy    ☐<sup>f</sup> Haut-Richelieu/Rouville    ☐<sup>i</sup> Pierre-Boucher    ☐<sup>l</sup> Autre(s) \_\_\_\_\_

Commentaires : \_\_\_\_\_  
 \_\_\_\_\_  
 \_\_\_\_\_  
 \_\_\_\_\_
